# Supplementary material for: Prenatal Fine Particulate Matter (PM2.5) Exposure and Pregnancy Outcomes—Analysis of Term Pregnancies in Poland
Source: MDPI journal article supplement (doi:10.3390/ijerph17165820), 2020-08-11
Supplement: s1 [file s1]

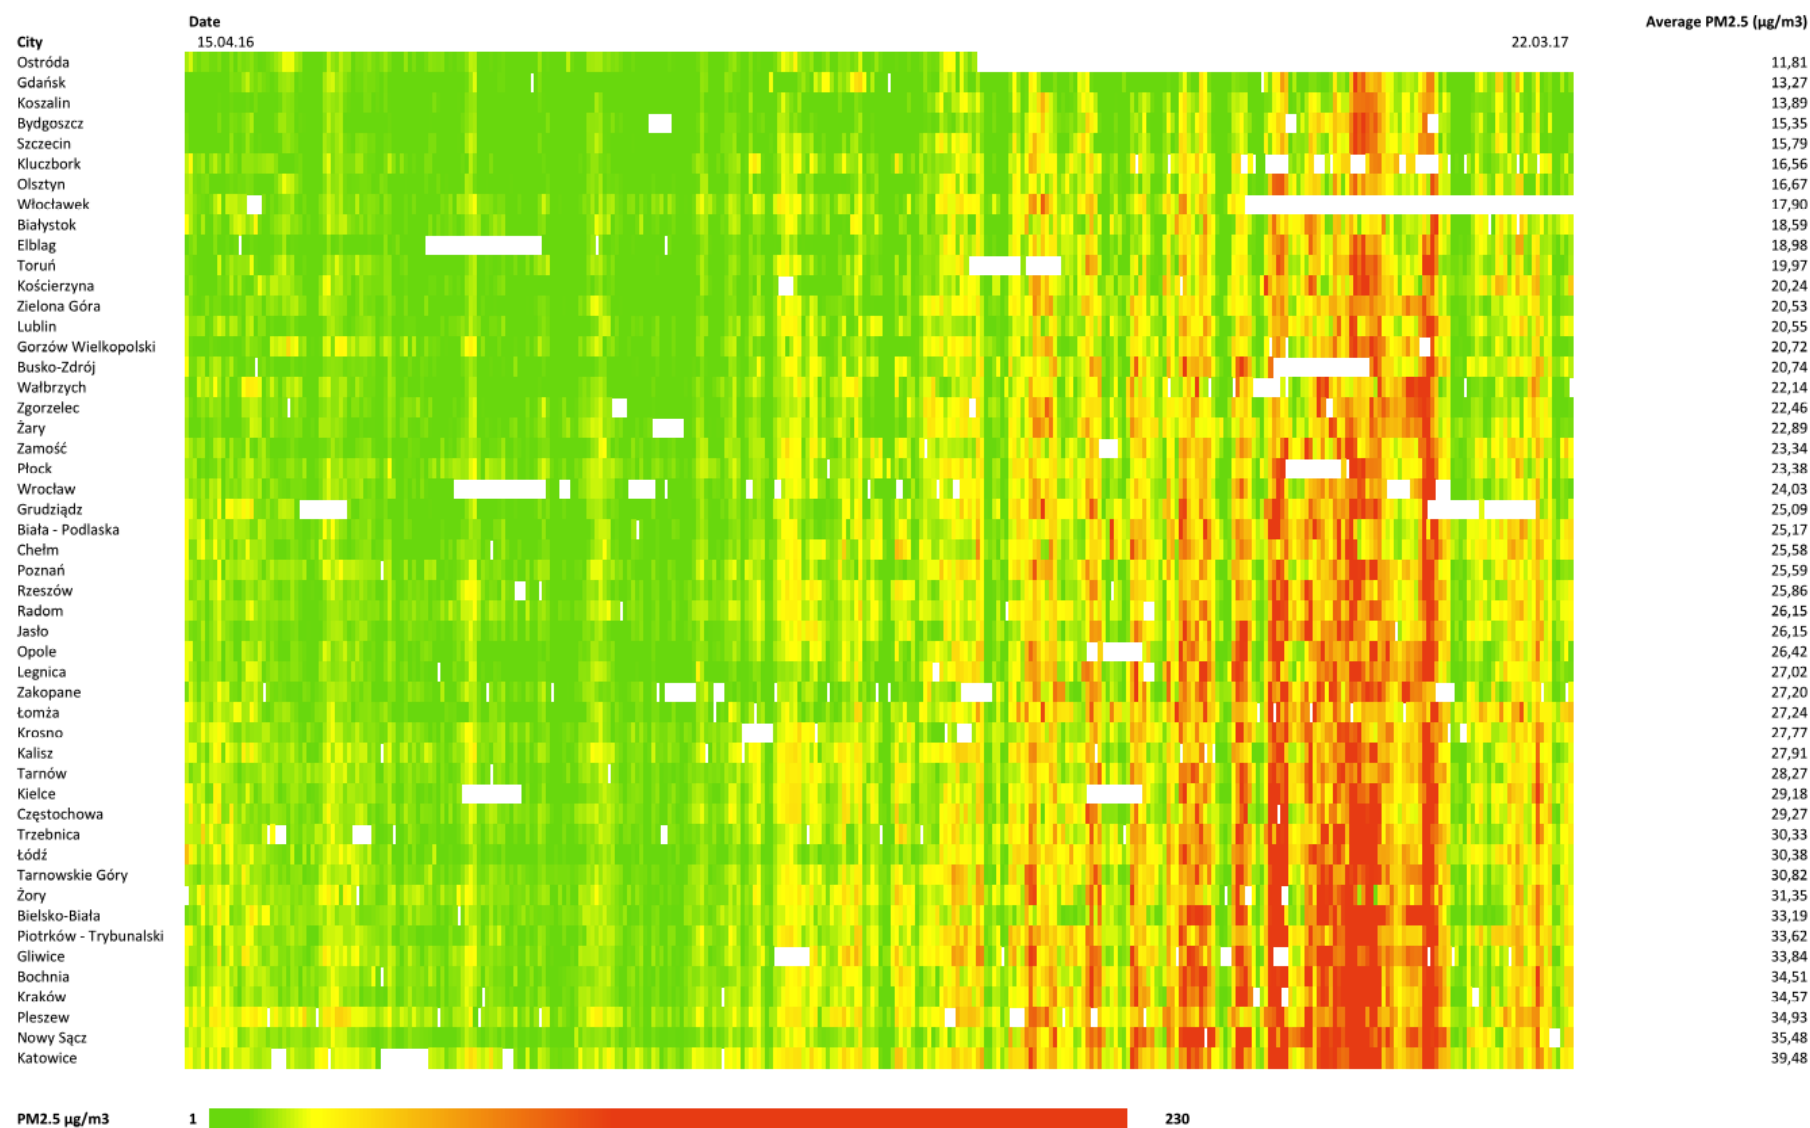

Figure 1. Concentration of PM2.5 in analyzed cities in Poland, between 15<sup>th</sup> of April 2016 and 22<sup>nd</sup> of March 2017.
